# Supplementary material for: Short-Term Effects of Climate Variability on Childhood Diarrhoea in Bangladesh: Multi-Site Time-Series Regression Analysis
Source: MDPI journal article supplement (doi:10.3390/ijerph20136279), 2023-07-02
Supplement: s1 [file s1]

## Short-term effects of climate variability on childhood diarrhoea in Bangladesh: multi-site time-series regression analysis

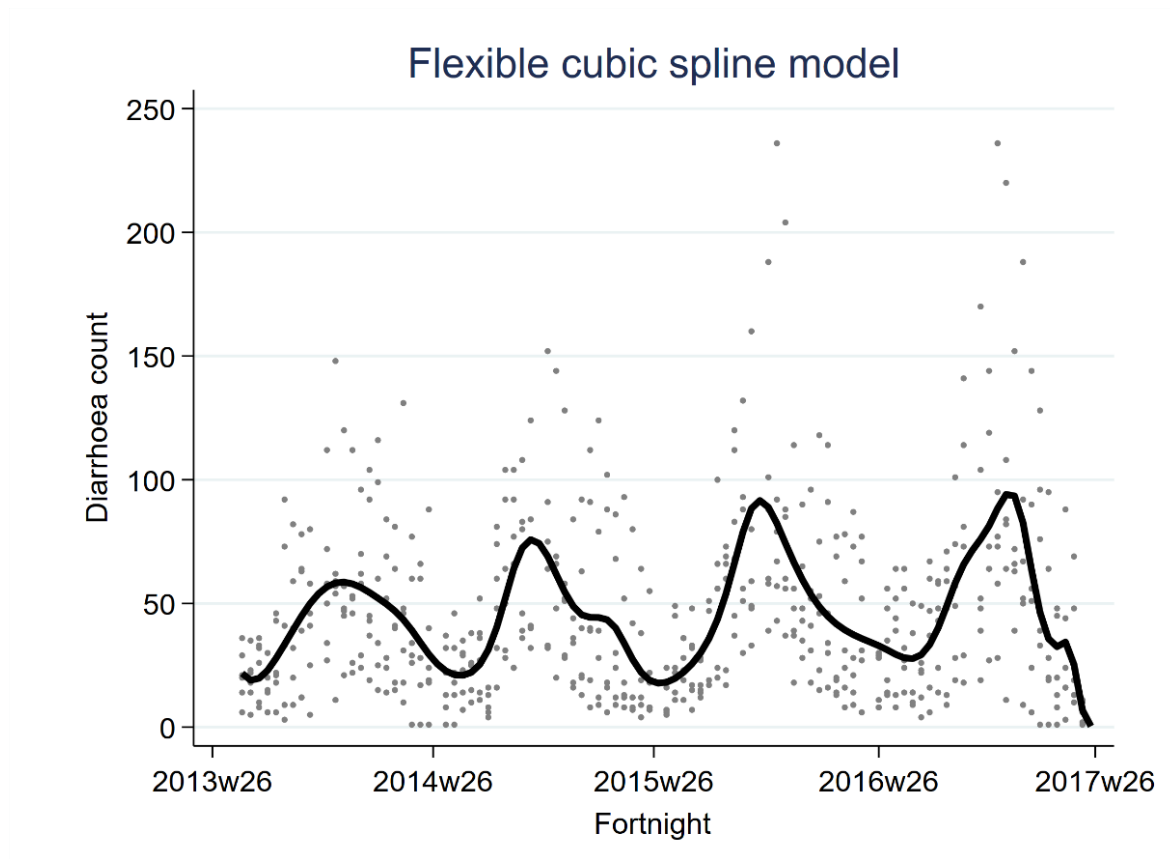

**Figure S1.** Modelling seasonality and long-term trends in childhood diarrhoea data, Bangladesh.

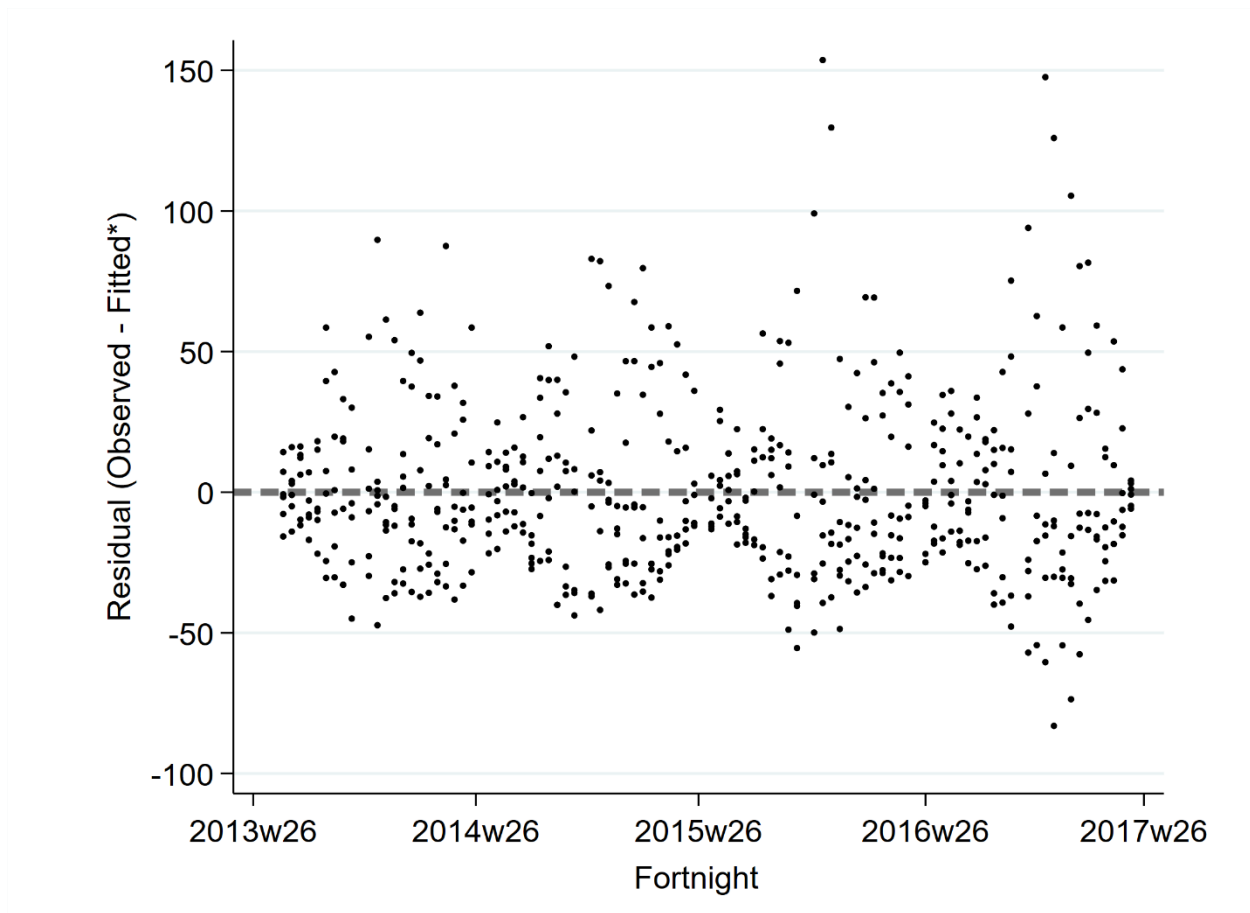

**Figure S2.** Residual variation in diarrhoea count after modelling seasonality and long-term trends. \*Fitted values were from the time spline model.

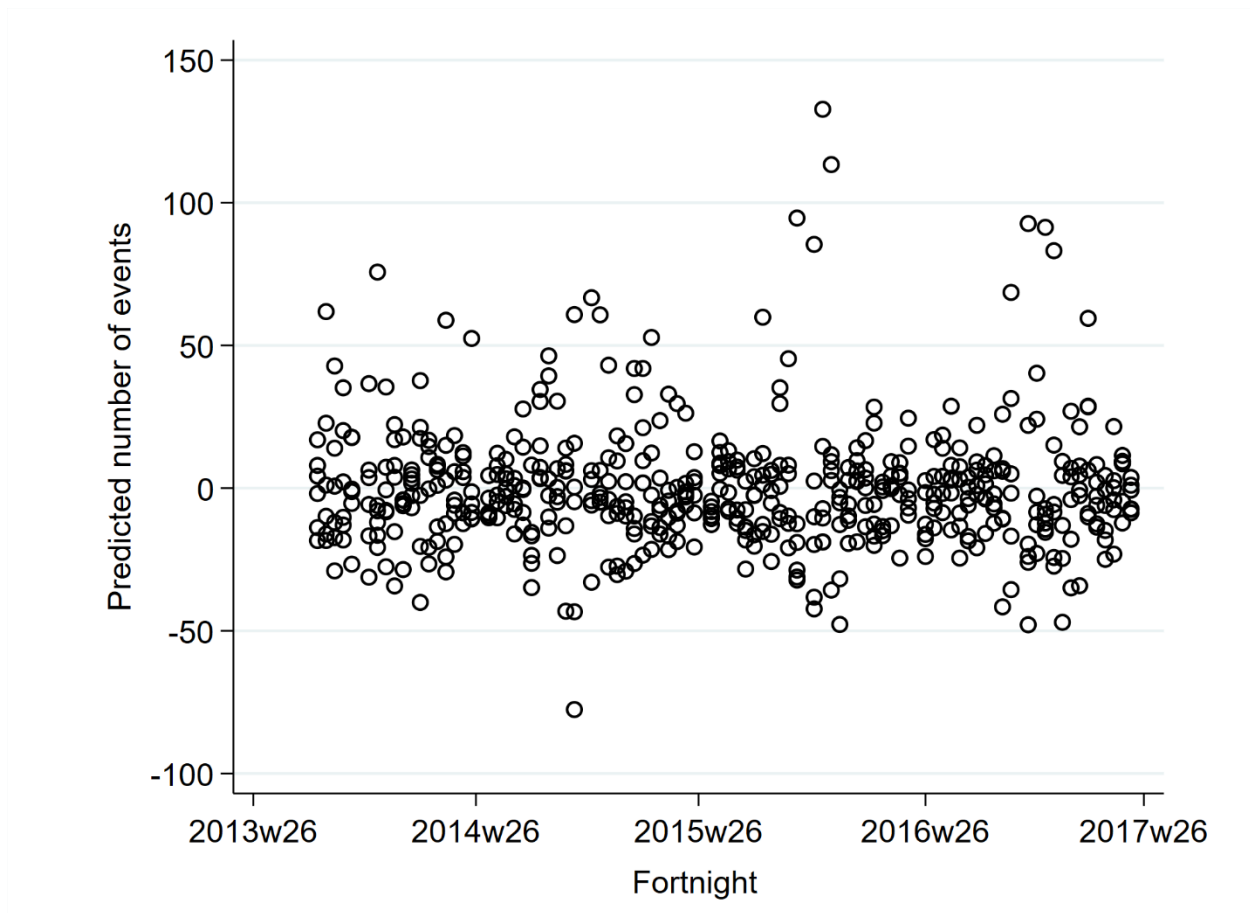

**Figure S1.** Scatter plot showing deviance residuals over the study period.

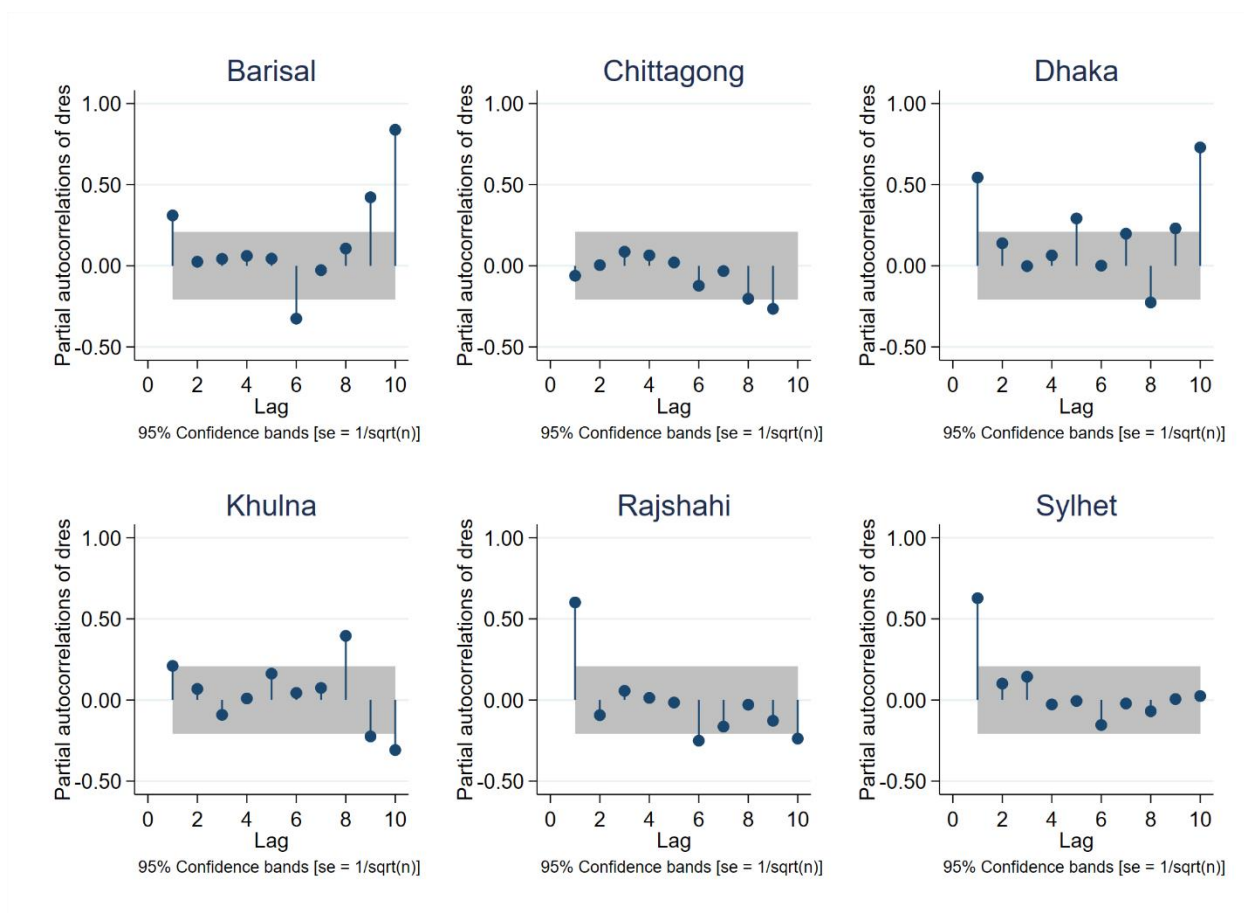

**Figure S2.** Partial autocorrelation function (PAF) plot of the deviance residuals (from adjusted model).

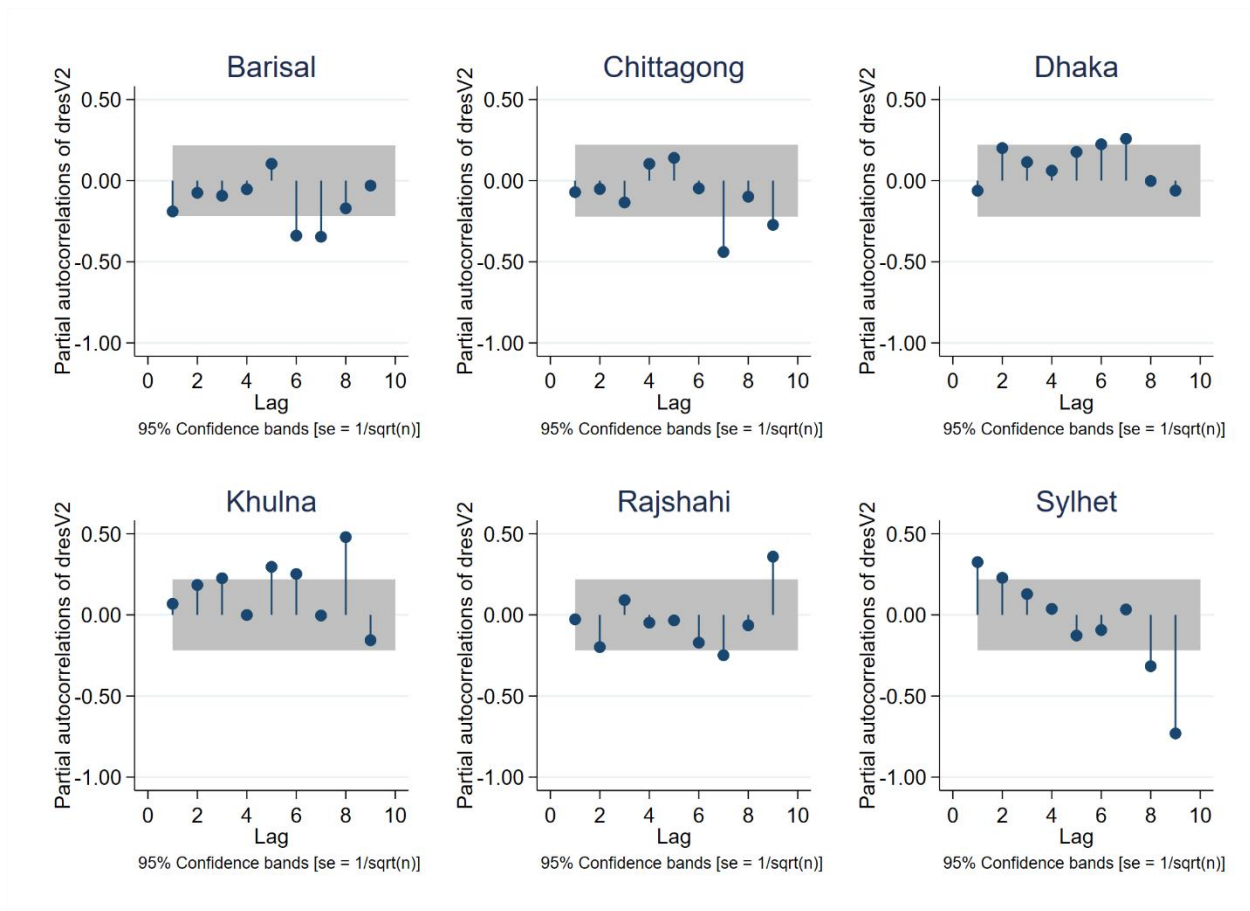

**Figure S3.** Partial autocorrelation function (PAF) plot including 1-fortnight lagged residuals in the model (from autocorrelated model).

**Table S1.** Model checking with different degrees of freedom for the spline basis and their associated Akaike information criteria (AIC) statistics.

| DF/year | Total DF          | Variables in the model             | AIC    |
|---------|-------------------|------------------------------------|--------|
| 4       | $4 \times 4 = 16$ | T-max, RH, Spline, Diarrhoea count | 23.209 |
| 5       | $5 \times 4 = 20$ | T-max, RH, Spline, Diarrhoea count | 22.964 |
| 6       | $6 \times 4 = 24$ | T-max, RH, Spline, Diarrhoea count | 22.817 |
| 7       | $7 \times 4 = 28$ | T-max, RH, Spline, Diarrhoea count | 22.648 |
